# Supplementary material
Source: PubMed Central journal article supplement (PMC7283364)
Supplement: NIHMS1589047-supplement-Supplementary_Figures.pdf [file NIHMS1589047-supplement-Supplementary_Figures.pdf]

## Supporting Information

### The proteasome as a drug target in the metazoan pathogen, *Schistosoma mansoni*

#Betsaida Bibo-Verdugo<sup>1,2,3</sup>, #Steven C Wang<sup>1,2,4</sup>, Jehad Almaliti<sup>5,6</sup>, Anh P. Ta<sup>2</sup>, Zhenze Jiang<sup>2,7</sup>, Derek A. Wong<sup>2</sup>, Christopher B. Lietz<sup>2</sup>, Brian M. Suzuki<sup>1,2</sup>, Nelly El-Sakkary<sup>1,2</sup>, Vivian Hook<sup>2</sup>, Guy S. Salvesen<sup>3</sup>, William H. Gerwick<sup>1,2,5</sup>, \*Conor R. Caffrey<sup>1,2</sup>, \*Anthony J. O'Donoghue<sup>1,2</sup>

#### Table of Contents

|                        |    |
|------------------------|----|
| Supplementary Figure 1 | S2 |
| Supplementary Figure 2 | S3 |

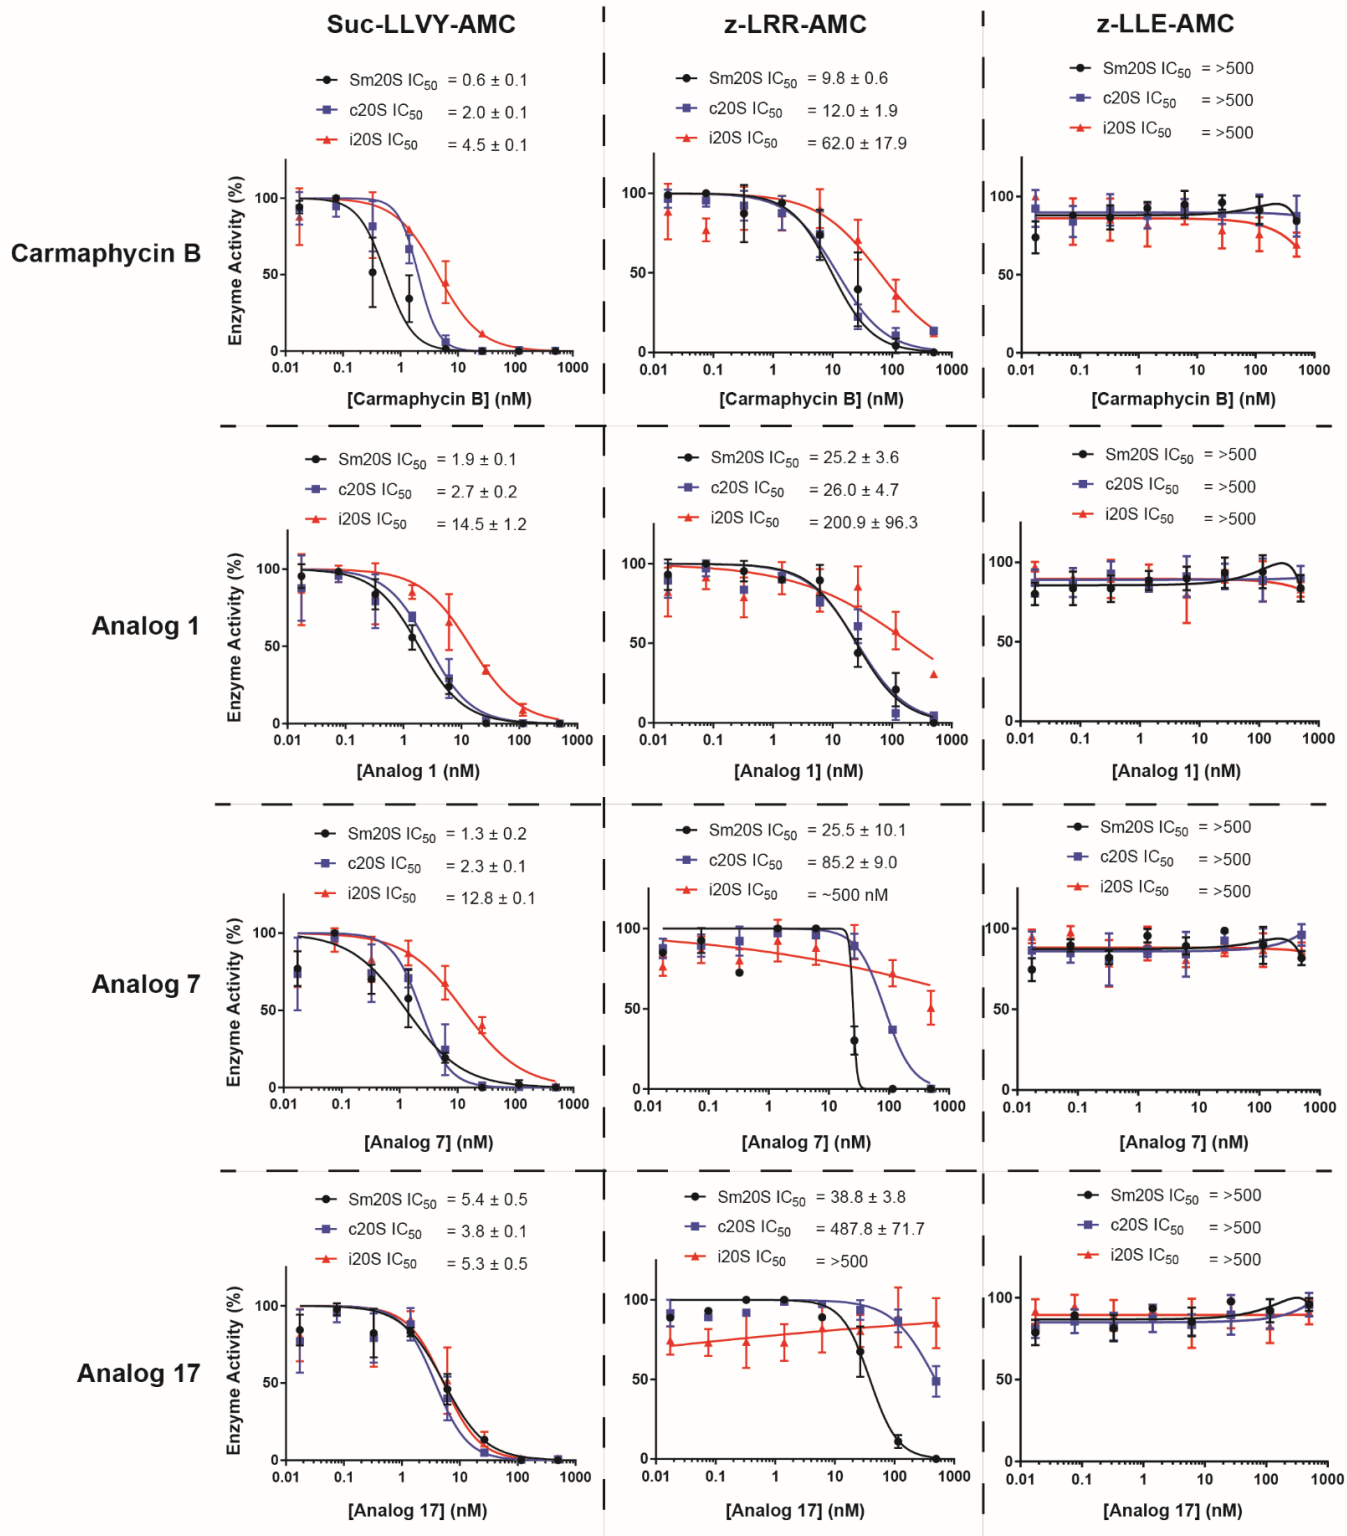

**Supplementary Figure 1.** Concentration response curves for carmaphycin B and analogs 1, 7 and 17 using the subunit selective substrates, Suc-LLVY-AMC ( $\beta_5$ ), z-LRR-AMC ( $\beta_2$ ) and z-LLE-AMC ( $\beta_1$ )

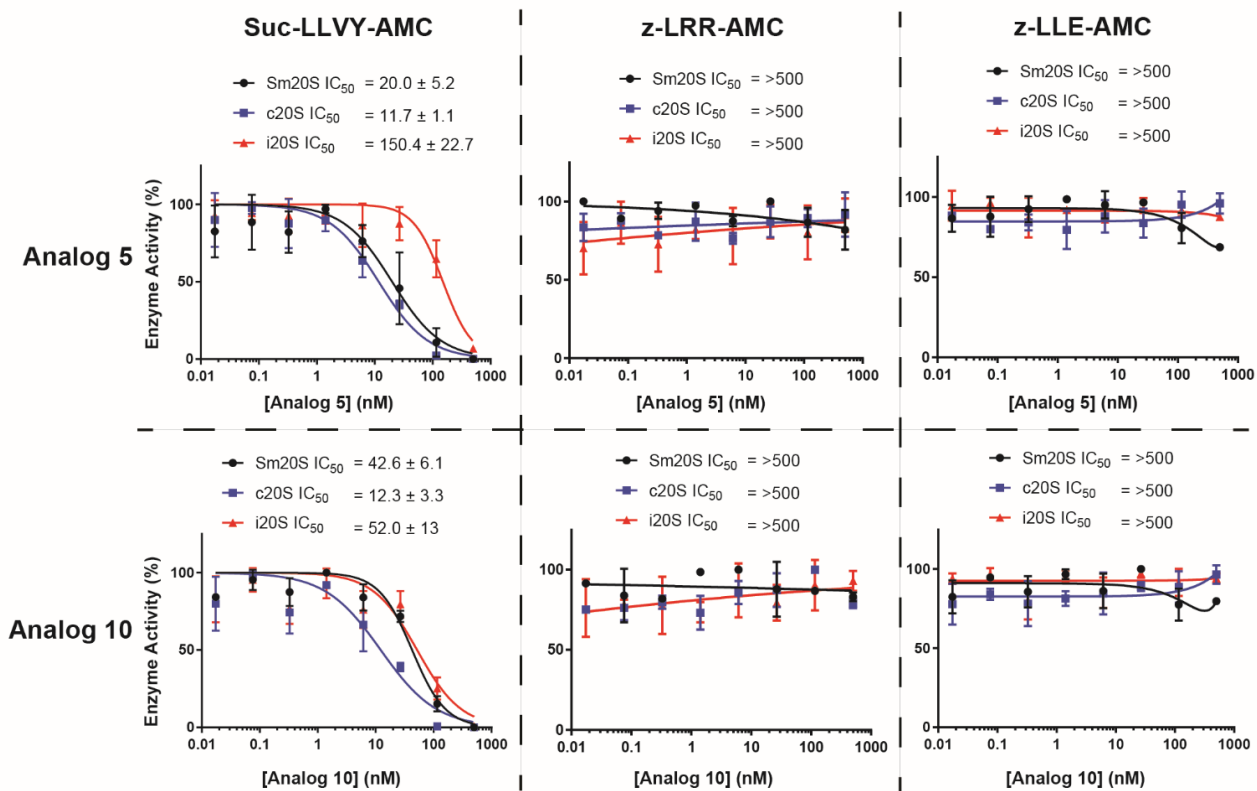

**Supplementary Figure 2.** Concentration response curves for analog 5 and analog 10 using the subunit selective substrates, Suc-LLVY-AMC ( $\beta 5$ ), z-LRR-AMC ( $\beta 2$ ) and z-LLE-AMC ( $\beta 1$ )
